# Supplementary material
Source: publisher figshare collection journal article supplement (https://sage.figshare.com/ndownloader/files/12728258)
Supplement: Supplementary file 1 [file 12728258]

Table S.4: Annual hazard for the underlying ER, HER2-specific survival curves (in the absence of screening and treatment) by stage and size at detection.
